# Supplementary material
Source: publisher figshare collection journal article supplement (https://rs.figshare.com/ndownloader/files/22734776)
Supplement: Supplementary file 1 [file 22734776]

# Coupling protocol of interlocked feedback oscillators in circadian clocks

Md. Mamunur Rashid<sup>1</sup> and Hiroyuki Kurata<sup>2\*</sup>

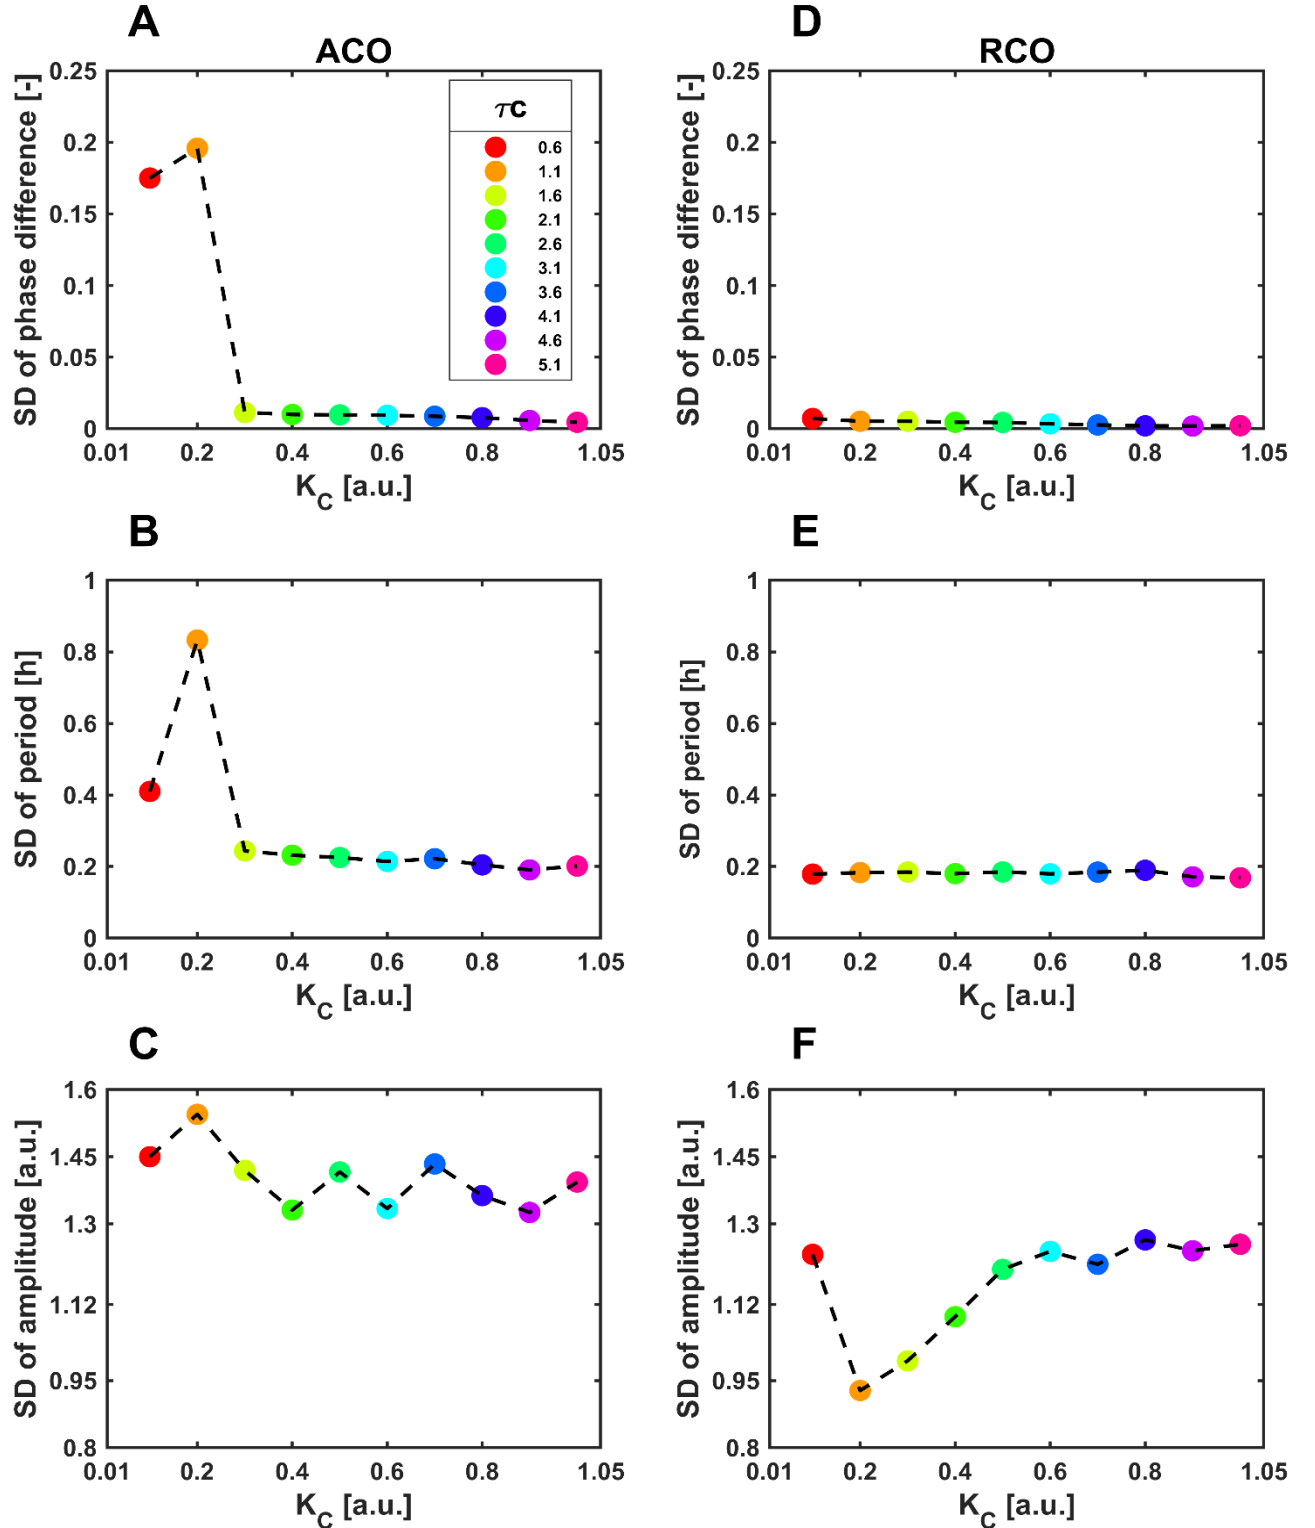

**Figure S1. Robustness of the anti-phase ACO and in-phase RCO with respect to multi-parameter random perturbations.**

We explicitly indicated the SD values of the phase difference, period and amplitude profiles of the anti-phase ACO and in-phase RCO in Figure 4. The SDs of the phase difference, period and amplitude of the anti-phase ACO were equal to or more than those of the in-phase RCO in respective regions of  $K_C$ .
